# Supplementary material
Source: publisher figshare collection journal article supplement (https://asha.figshare.com/ndownloader/files/30871681)
Supplement: Supplementary file 1 [file 30871681]

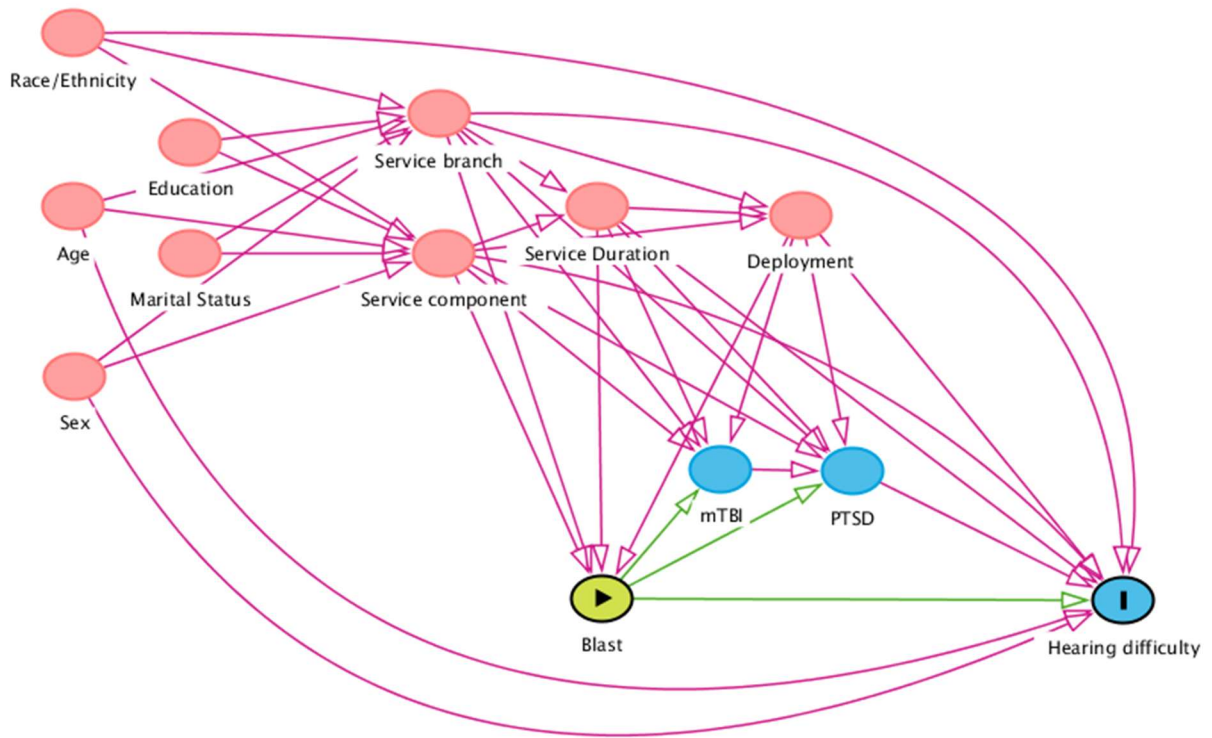

**Supplemental Material S1.** Directed acyclic graph depicting causal pathways between blast exposure and self-reported hearing difficulty with mediation by PTSD. Some arrows have been omitted to increase clarity of the causal effects of interest. Figure created using Daggity (Textor, van der Zander, Gilthorpe, Liskiewicz, & Ellison, 2016).
